# Supplementary material for: The temporal distribution, source and potential toxicity of polycyclic aromatic hydrocarbons in a sediment core from an urban lake in Wuhan, China
Source: Royal Society of Chemistry journal article supplement (doi:10.1039/c4em00698d), 2015-01-01
Supplement: c4em00698d1.pdf [file c4em00698d1.pdf]

## Supporting Information

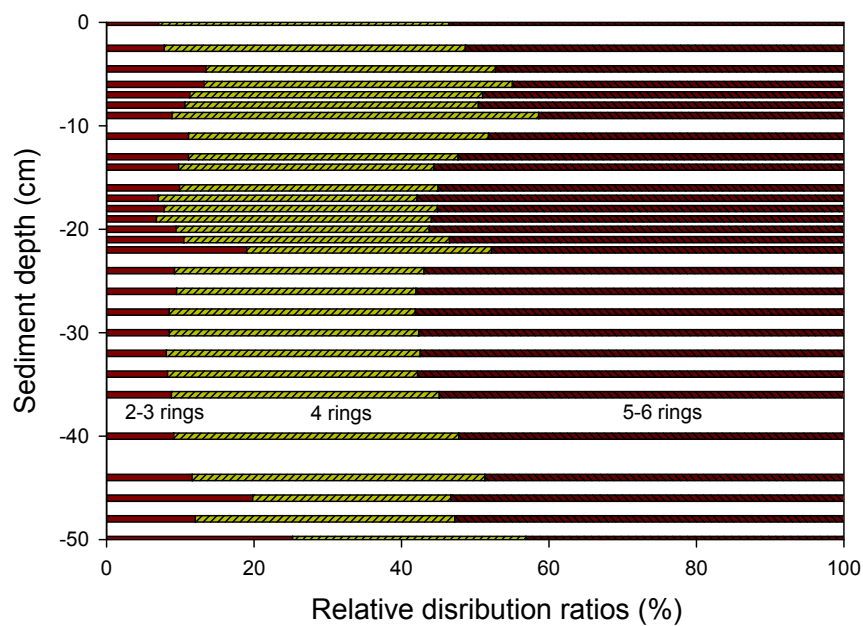

Fig. S1 The relative distribution profile of parent PAHs versus sediment depth
